# Supplementary material for: Understanding College Students' Continued Intention to Engage in Choirs: Roles of Music Quality and Psychosocial Influences
Source: Research Square preprint supplement (doi:10.21203/rs.3.rs-7128957/v1), 2025-11-17
Supplement: Supplementary file 1 [file 635074e6f883649bc60921e6.pdf]

## **Appendix I Questionnaire**

### **Chorus Survey Questionnaire**

Dear classmates:

Thank you for participating in this survey and research on university choirs. This questionnaire aims to understand your views and satisfaction with various aspects of university choir. Your answer will help us with the methods and approaches of choir education to better serve students. Please fill out the questionnaire based on your true situation and feelings. All answers will be strictly confidential and will only be used for academic research.

#### **Part1 Basic Information**

How old are you?

18-20 years old

21-23 years old

24-26 years old

What is your gender?

Male

Female

What is your major?

Philosophy, economics, law, education, literature, history, science, engineering, agriculture, medicine, military science, management, art

What is your grade level?

Freshman

Sophomore

Junior

Senior

**Part 2 Main part (please mark a "√" in the corresponding column based on your situation)**

Note: please, indicate your opinions about each of the questions below by ticking one of the five responses provided in the column on the right side. The response scale ranges from “Strongly disagree” to “Strongly agree”. You may choose any of the five possible responses, as each represents a degree on the continuum.

| <b>Construct</b>               | <b>Items</b>                                                                                              | 5<br>SA | 4<br>A | 3<br>N | 2<br>D | 1<br>SD |
|--------------------------------|-----------------------------------------------------------------------------------------------------------|---------|--------|--------|--------|---------|
| <b>Social groups</b>           | 1. I think our classmates attach great importance to the choir.                                           |         |        |        |        |         |
|                                | 2. I think my friends all value the choir.                                                                |         |        |        |        |         |
|                                | 3. I think the whole society values choirs.                                                               |         |        |        |        |         |
|                                | 4. The choir's activities have increased my opportunities to communicate with other students.             |         |        |        |        |         |
| <b>Song's content quality</b>  | 1. I prefer choir singing popular social media songs.                                                     |         |        |        |        |         |
|                                | 2. I think choirs should sing more traditional old songs.                                                 |         |        |        |        |         |
|                                | 3. The choir sings a wide variety of songs.                                                               |         |        |        |        |         |
|                                | 4. The songs performed by the choir are very attractive to me.                                            |         |        |        |        |         |
|                                | 5. I think the choir's songs are of high quality.                                                         |         |        |        |        |         |
| <b>Perceived Self-efficacy</b> | 1. I believe I can understand the most difficult part of choir singing.                                   |         |        |        |        |         |
|                                | 2. I believe I can perform and test this choir well.                                                      |         |        |        |        |         |
|                                | 3. I am confident that I will have an outstanding performance in the choir.                               |         |        |        |        |         |
|                                | 4. When faced with difficulties, I usually come up with some coping strategies.                           |         |        |        |        |         |
|                                | 5. I have confidence in interpersonal communication in the choir.                                         |         |        |        |        |         |
| <b>Perceived usefulness</b>    | 1. I believe that participating in a choir can help improve my music skills.                              |         |        |        |        |         |
|                                | 2. I think participating in the choir is helpful for my academic learning.                                |         |        |        |        |         |
|                                | 3. I believe that participating in the choir will have a positive impact on my future career development. |         |        |        |        |         |
|                                | 4. I think participating in the choir has enhanced my confidence and communication skills.                |         |        |        |        |         |
| <b>Satisfaction</b>            | 1. I am satisfied with the overall experience of the choir.                                               |         |        |        |        |         |
|                                | 2. Participating in the choir fulfilled my expectations.                                                  |         |        |        |        |         |
|                                | 3. I am satisfied with the rehearsal arrangement of the                                                   |         |        |        |        |         |

|                                |                                                                                                 |  |  |  |  |  |
|--------------------------------|-------------------------------------------------------------------------------------------------|--|--|--|--|--|
|                                | choir.                                                                                          |  |  |  |  |  |
|                                | 4. I am satisfied with the quality of the choir's performance.                                  |  |  |  |  |  |
|                                | 5. I am satisfied with my social experience in the choir.                                       |  |  |  |  |  |
|                                | 6. I am satisfied with the teamwork among the members of the choir.                             |  |  |  |  |  |
| <b>Personal music literacy</b> | 1. I have a certain understanding of music theory.                                              |  |  |  |  |  |
|                                | 2. I can recognize and understand various music styles and genres.                              |  |  |  |  |  |
|                                | 3. I have strong skills in playing musical instruments.                                         |  |  |  |  |  |
|                                | 4. I have a strong interest in participating in music related activities.                       |  |  |  |  |  |
| <b>Participative behavior</b>  | 1. I often participate in choir rehearsals and performance activities.                          |  |  |  |  |  |
|                                | 2. I am always very engaged and proactive in choir activities.                                  |  |  |  |  |  |
|                                | 3. I will proactively provide suggestions and opinions to improve the performance of the choir. |  |  |  |  |  |
|                                | 4. I plan to continue participating in choir activities next semester.                          |  |  |  |  |  |
|                                | 5. I will recommend my classmates and friends to participate in choir activities.               |  |  |  |  |  |
